# Supplementary material
Source: ML conference proceedings conference paper supplement (https://www.ecva.net/papers/eccv_2024/papers_ECCV/html/857_ECCV_2024_paper.php)
Supplement: Supplementary file 1 [file 00857-supp.pdf]

## Supplementary Material

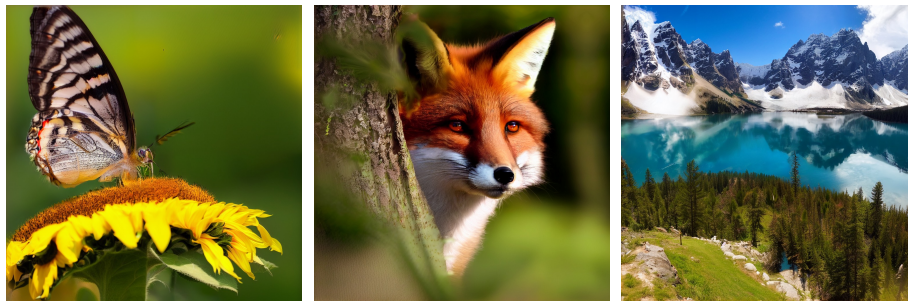

(a) Stable Diffusion 1.5 ( $1024 \times 1024$ ,  $4\times$ )

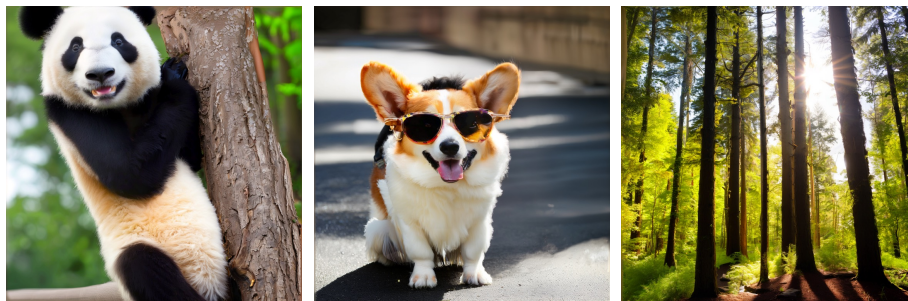

(b) Stable Diffusion 2.1 ( $1536 \times 1536$ ,  $4\times$ )

**Fig. 1:** Results of AccDiffusion on other stable diffusion variants: (a) Stable diffusion 1.5 (default resolution of  $512^2$ ) and (b) Stable diffusion 2.1 (default resolution of  $768^2$ ). All images are generated at  $4\times$  resolution. Prompts are provided in Sec. H.

### A More Stable Diffusion Variants

We apply AccDiffusion on other LDMs, specifically Stable Diffusion 1.5 (SD 1.5) [5] and Stable Diffusion 2.1 [6] (SD 2.1). As shown in Fig. 1, AccDiffusion successfully generates higher-resolution images without repetition. It is important to note that the results of AccDiffusion depend on the prior knowledge of LDMs, and the performance of SD 1.5 and SD 2.1 is inferior to SDXL [4]. Therefore, the fidelity of their results are less astonishing than those on SDXL.

### B More Visualization

We provide more results of AccDiffusion on SDXL. As shown in Fig. 2, our AccDiffusion can generate various higher-resolution images without object repetition. Prompts are provided in Sec. H.

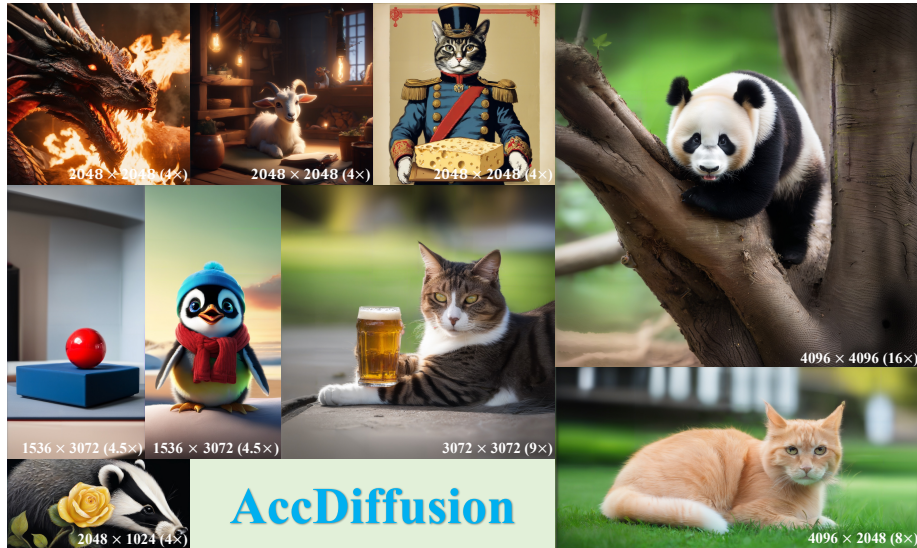

**Fig. 2:** More higher-resolution results of AccDiffusion on SDXL (default resolution of  $1024^2$ ). Best viewed with zooming in.

## C Default Setting of DemoFusion

To ensure a fair comparison with DemoFusion [2], we conduct our experiments using its default settings listed in Table 1. For a more comprehensive understanding of DemoFusion, please refer to the original paper [2].

**Table 1:** The default setting of DemoFusion [2].

| Parameters | Explanation    | Values        |
|------------|----------------|---------------|
| $T$        | DDIM Steps     | 50            |
| $s$        | Guidance Scale | 7.5           |
| $h$        | Latent Height  | 128           |
| $w$        | Latent Width   | 128           |
| $d_h$      | Height Stride  | $\frac{h}{2}$ |
| $d_w$      | Width Stride   | $\frac{w}{2}$ |
| $\alpha_1$ | Scale factor 1 | 3             |
| $\alpha_2$ | Scale factor 2 | 1             |
| $\alpha_3$ | Scale factor 3 | 1             |

## D More Qualitative Comparison Results

We provide more qualitative comparison results in Fig. 3 and Fig. 4. More qualitative results provide stronger evidence that our method can generate high-resolution images without repetition.

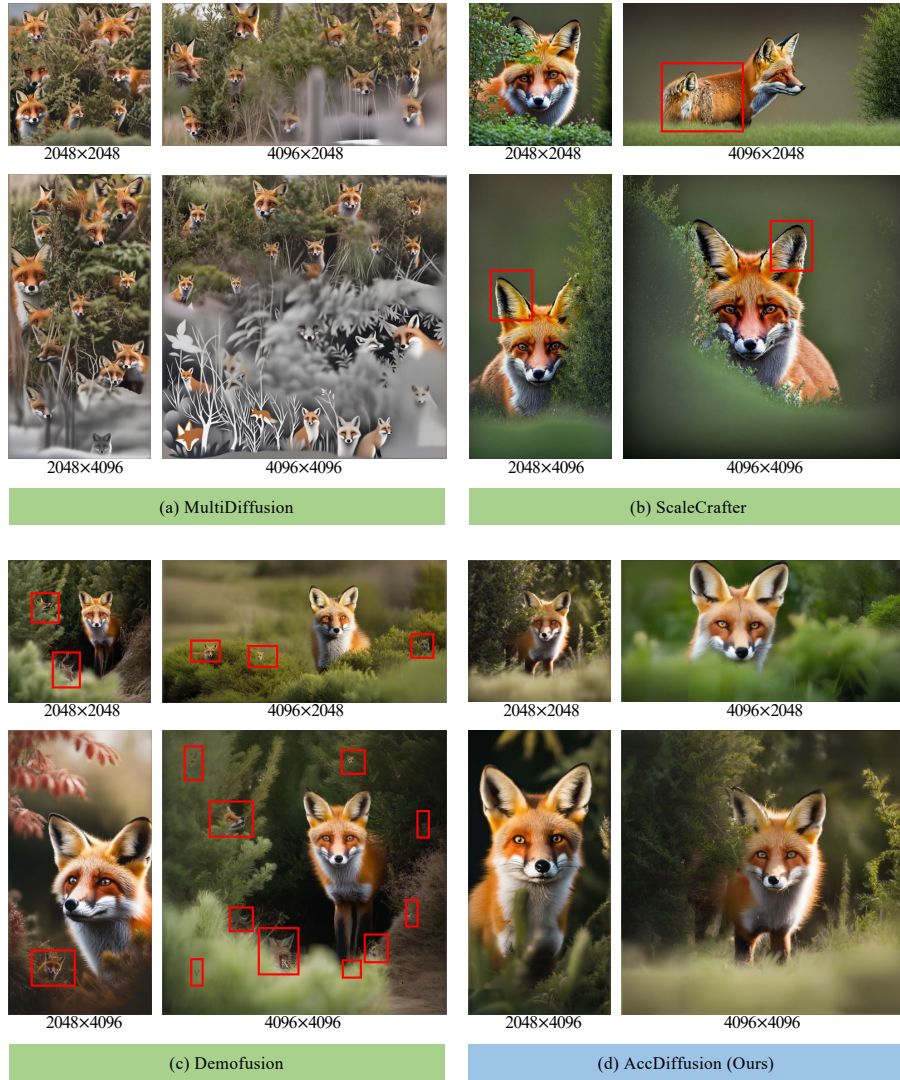

Prompt: A fox peeking out from behind a bush.

**Fig. 3:** Qualitative comparison of our AccDiffusion with existing training-free image generation extrapolation methods [1–3]. We draw a red box upon the generated images to highlight the repeated objects. Best viewed zoomed in.

## E Details on any aspect ratio generation.

First, we initialize a latent noise with the expected ratio and set the longer side to training resolution (*e.g.*,  $1024 \times 512$  for 2:1). Then we use the same pipeline



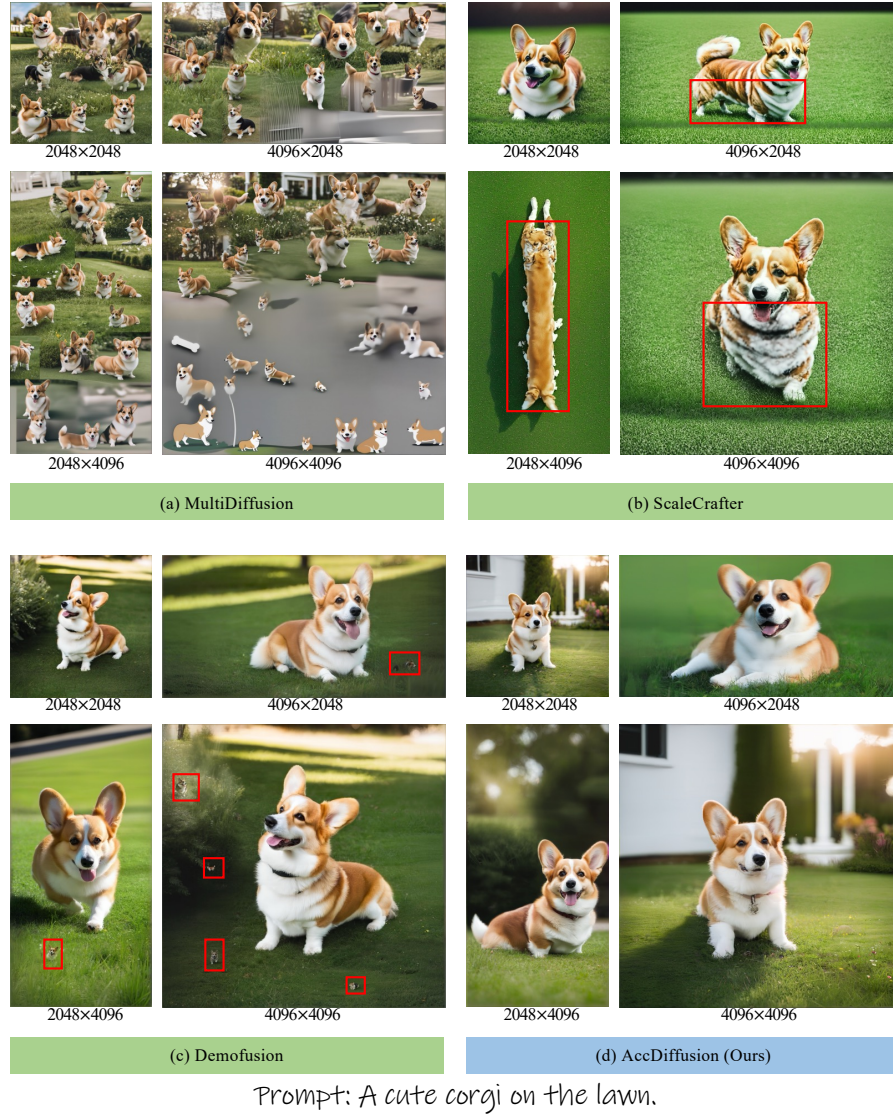

**Fig. 4:** Qualitative comparison of our AccDiffusion with existing training-free image generation extrapolation methods [1–3]. We draw a red box upon the generated images to highlight the repeated objects. Best viewed zoomed in.

as the 1:1 aspect ratio to progressively generate higher-resolution images, as shifted window sampling and dilated sampling are compatible with any aspect ratio. More details can be found in DemoFusion [2].

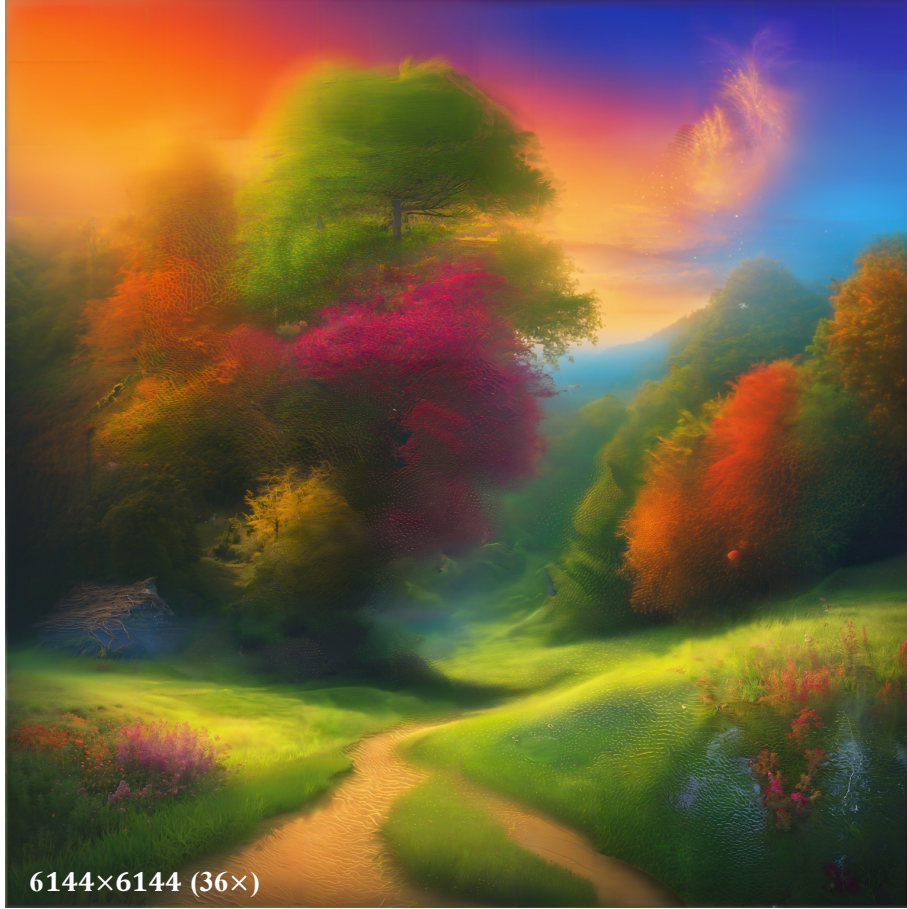

Prompt : "Summer landscape, vivid colors, a work of art, grotesque, Mysterious."

**Fig. 5:** Failure case of indefinite extrapolation.

## **F Indefinite extrapolation.**

Following the recent works, we provide results in main paper within 4K for comparisons. Ideally, both AccDiffusion and patch-wise methods can extrapolate indefinitely. However, we find that AccDiffusion faces detail degradation when the resolution is beyond 6K (36 $\times$ ), as shown in Fig. 5.

## G Pseudo Code of AccDiffusion

AccDiffusion follows the pipeline of DemoFusion [2] and uses the patch-content-aware prompts during the progress of higher-resolution image generation. Additionally, AccDiffusion enhances dilated sampling with window interaction. Algorithm 1 illustrates the process of higher-resolution generation using AccDiffusion. We use red color to highlight two core modules proposed by AccDiffusion.

## H Prompts Used in Supplement Material

**Fig. 1:**

1. A butterfly landing on a sunflower.
2. A fox peeking out from behind a bush.
3. A picturesque mountain scene with a clear lake reflecting the surrounding peaks.
4. A cute panda on a tree trunk.
5. A corgi wearing cool sunglasses.
6. Primitive forest, towering trees, sunlight falling, vivid colors.

**Fig. 2:**

1. A close-up of a fire spitting dragon, cinematic shot.
2. Cute adorable little goat, unreal engine, cozy interior lighting, art station, detailed' digital painting, cinematic, octane rendering.
3. A propaganda poster depicting a cat dressed as french emperor napoleon holding a piece of cheese.
4. A cute panda on a tree trunk.
5. a photograph of a red ball on a blue cube.
6. a baby penguin wearing a blue hat, red gloves, green shirt, and yellow pants.
7. a cat drinking a pint of beer.
8. A young badger delicately sniffing a yellow rose, richly textured oil painting.
9. A cute cat on the lawn.

---

**Algorithm 1** The process of higher-resolution generation using AccDiffusion
 

---

**Input:**  $h', w'$  ▷ Latent Size of Desired Image  
 $\mathcal{E}_\theta, h, w$  ▷ Pre-trained Stable diffusion and Pre-trained Latent Size  
 $y, \mathcal{D}$  ▷ Prompt and Decoder  
 $\eta_1, \eta_2$  ▷ Decreasing From 1 to 0 Using a Cosine Schedule

1: ##### Phase 1: Low resolution image generation #####  
 2:  $\mathbf{z}_T \sim \mathcal{N}(0, I)$  ▷ Random Initialization  
 3: **for**  $t = T$  to 1 **do**  
 4:    $\mathbf{z}_{t-1} = \sqrt{\frac{\alpha_{t-1}}{\alpha_t}} \mathbf{z}_t + \left( \sqrt{\frac{1}{\alpha_{t-1}} - 1} - \sqrt{\frac{1}{\alpha_t} - 1} \right) \cdot \varepsilon_\theta(\mathbf{z}_t, t, \tau_\theta(y))$ .  
 5:   ▷ Denoising with Image-content-aware Prompt and Save Cross-Attention Map  $\mathcal{M}$   
 6: **end for**  
 7:  $\mathcal{Z}_0 = \mathbf{z}_0$   
 8:  $S = \frac{h'}{h} \times \frac{w'}{w}$  ▷ Progressive Upscaling Times  
 9: ##### Phase 2: Higher-resolution image generation #####  
 10: **for**  $s = 2$  to  $S$  **do** ▷ Progressive Upscaling  
 11:    $\mathcal{Z}_0 = \text{inter}(\mathcal{Z}_0, (h \times s, w \times s))$  ▷ Interpolation Upsampling  
 12:   **for**  $t = 1$  to  $T$  **do**  
 13:      $\mathcal{Z}'_t = \sqrt{\alpha_t} \mathcal{Z}_0 + \sqrt{1 - \alpha_t} \varepsilon, \quad \varepsilon \sim \mathcal{N}(0, \mathbf{I})$   
 14:     ▷ Getting Noise-inversed Representations  
 15:   **end for**  
 16:    $\mathcal{Z}_T = \mathcal{Z}'_T$   
 17:   **for**  $t = T$  to 1 **do**  
 18:      $\hat{\mathcal{Z}}_t = \eta_1 \times \mathcal{Z}'_t + (1 - \eta_1) \times \mathcal{Z}_t$  ▷ Skip Residual  
 19:      $\{\mathbf{z}_t^i\}_{i=1}^{P_1} = \text{Sampling}_1(\hat{\mathcal{Z}}_t)$  ▷ Shift Window Sampling From MultiDiffusion  
 20:      $\mathcal{M} \rightarrow \{\gamma^i\}_{i=1}^{P_1}$  ▷ Calculating **Patch-Content-Aware Prompt**  
 21:      $\{\mathcal{D}_t^i\}_{i=1}^{P_2} = \text{Sampling}_2(\hat{\mathcal{Z}}_t)$  ▷ Dilated Sampling From DemoFusion  
 22:     **for**  $\mathbf{z}_t^i$  in  $\{\mathbf{z}_t^i\}_{i=1}^{P_1}$  **do**  
 23:        $\mathbf{z}_{t-1}^i = \sqrt{\frac{\alpha_{t-1}}{\alpha_t}} \mathbf{z}_t^i + \left( \sqrt{\frac{1}{\alpha_{t-1}} - 1} - \sqrt{\frac{1}{\alpha_t} - 1} \right) \cdot \varepsilon_\theta(\mathbf{z}_t^i, t, \tau_\theta(\gamma^i))$ .  
 24:       ▷ Denoising with **Patch-Content-Aware Prompt**  
 25:     **end for**  
 26:     **for**  $\mathcal{D}_t^i$  in  $\{\mathcal{D}_t^i\}_{i=1}^{P_2}$  **do**  
 27:        $\mathcal{D}_{t-1}^{k,h,w} = \mathcal{D}_t^{f_t^{h,w}(k),h,w}$  ▷ **Window Interaction with Bijective Function**  
 28:        $\mathcal{D}_{t-1}^i = \sqrt{\frac{\alpha_{t-1}}{\alpha_t}} \mathcal{D}_t^i + \left( \sqrt{\frac{1}{\alpha_{t-1}} - 1} - \sqrt{\frac{1}{\alpha_t} - 1} \right) \cdot \varepsilon_\theta(\mathcal{D}_t^i, t, \tau_\theta(y))$   
 29:       ▷ Denoising with Image-Content-Aware Prompt  
 30:        $\mathcal{D}_{t-1}^{k,h,w} = \mathcal{D}_{t-1}^{(f_t^{h,w})^{-1}(k),h,w}$  ▷ **Recover**  
 31:     **end for**  
 32:     **end for**  
 33:      $\mathcal{Z}_{t-1} = \eta_2 \times \text{Fuse}(\{\mathcal{D}_t^i\}_{i=1}^{P_2}) + (1 - \eta_2) \times \text{Fuse}(\{\mathbf{z}_t^i\}_{i=1}^{P_1})$   
 34:     ▷ Fusing Shift Window Sampling Patches and Dilated Sampling Patches  
 35:   **end for**  
 36: **end for**  
**Output:**  $\mathbf{x}_0 = \mathcal{D}(\mathcal{Z}_0)$  ▷ Decoding to Image

---

## References

1. Bar-Tal, O., Yariv, L., Lipman, Y., Dekel, T.: Multidiffusion: Fusing diffusion paths for controlled image generation. In: ICML (2023)
2. Du, R., Chang, D., Hospedales, T., Song, Y.Z., Ma, Z.: Demofusion: Democratising high-resolution image generation with no \$\$\$\$. In: CVPR (2024)
3. He, Y., Yang, S., Chen, H., Cun, X., Xia, M., Zhang, Y., Wang, X., He, R., Chen, Q., Shan, Y.: Scalecrafter: Tuning-free higher-resolution visual generation with diffusion models. In: ICLR (2024)
4. Podell, D., English, Z., Lacey, K., Blattmann, A., Dockhorn, T., Müller, J., Penna, J., Rombach, R.: Sdxl: Improving latent diffusion models for high-resolution image synthesis. In: ICLR (2024)
5. Robin Rombach, P.E.: Stable diffusion v1-5 model card, <https://huggingface.co/runwayml/stable-diffusion-v1-5>
6. Robin Rombach, P.E.: Stable diffusion v2-1 model card, <https://huggingface.co/stabilityai/stable-diffusion-2-1>
